# Supplementary material for: Impact of millennial-scale oceanic variability on the Greenland ice-sheet evolution throughout the last glacial period
Source: Copernicus journal article supplement (doi:10.5194/cp-15-593-2019), 2019-03-28
Supplement: Supplementary file 2 [file cp-15-593-2019-supplement.zip]

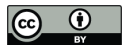

## *Supplement of*

# **Impact of millennial-scale oceanic variability on the Greenland ice-sheet evolution throughout the last glacial period**

**Ilaria Tabone et al.**

*Correspondence to:* Ilaria Tabone (itabone@ucm.es)

- cp-15-593-2019-supplement-title-page.pdf
- SM
  - movie\_sub.mp4
  - suppl\_mat.pdf

The copyright of individual parts of the supplement might differ from the CC BY 4.0 License.
